# Supplementary material for: Quality Evaluation of Ophiopogonis Radix from Two Different Producing Areas
Source: PubMed Central journal article supplement (PMC6766908; doi:10.3390/molecules24183220), 2019-09-04
Supplement: molecules-24-03220-s001.pdf [file molecules-24-03220-s001.pdf]

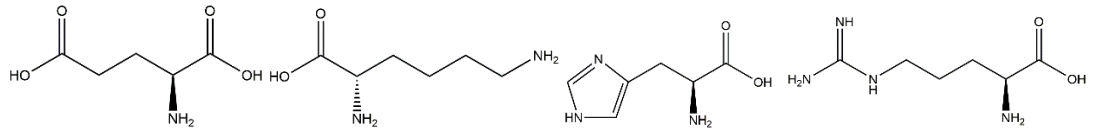

Glutamic acid (1)

Lysine (2)

Histidine (3)

Arginine (4)

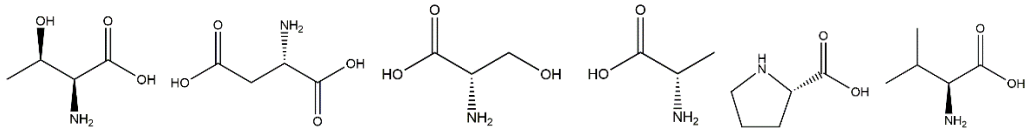

Threonine (5)

Aspartic acid (6)

Serine (7)

Alanine (8)

Proline (9)

Valine (10)

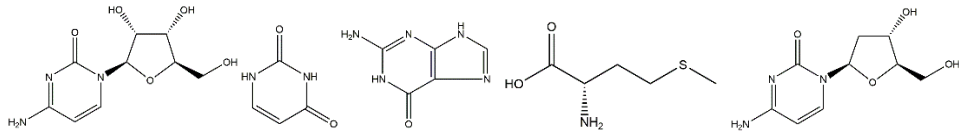

Cytidine (11)

Uracil (12)

Guanine (13)

Methionine (14)

2'-deoxycytidine (15)

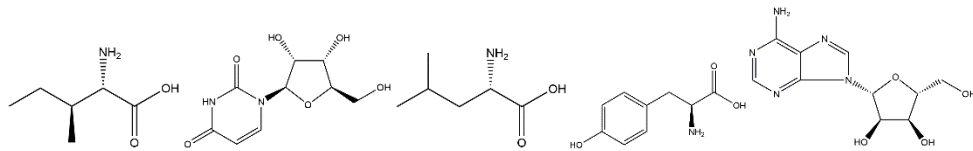

Isoleucine (16)

Uridine (17)

Leucine (18)

Tyrosine (19)

Adenosine (20)

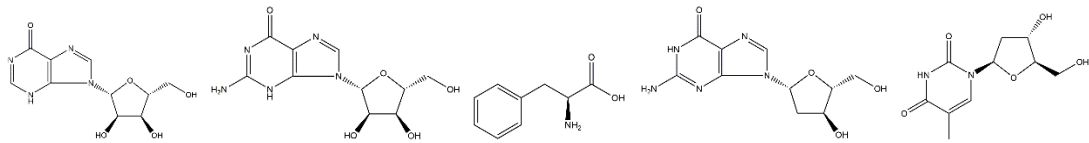

Inosine (21)

Guanosine (22)

Phenylalanine (23)

2'-deoxyguanosine (24)

Thymidine (25)

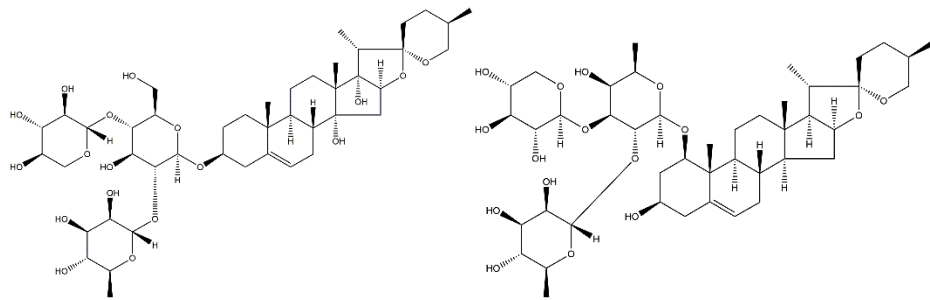

Ophiopogonin C (26)

Ophiopogonin D (27)

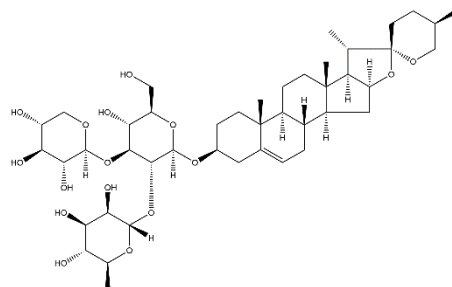

Ophiopogonin D' (28)

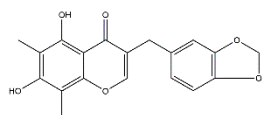

Methylophiopogonone A (29)

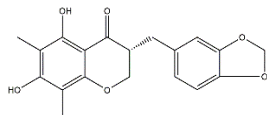

Methylophiopogonone A (30)

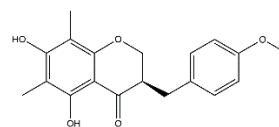

Methylophiopogonone B (31)

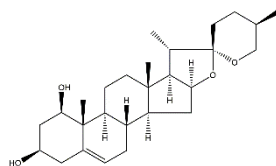

Ruscogenin (32)

**Figure S1.** Chemical structures of 32 reference substances

**Table S1.** Regression equation, limit of detection (LODs) and limit of quantification (LOQs), precision, repeatability, stability, and recovery of 32 investigated compounds.

| No. | Compounds            | Regression Equation  | <i>r</i> | Liner Range (ng/mL) | LOD (ng/mL) | LOQ (ng/mL) | Precision     |               | Repeatability | Stability     | Recovery (%) |      | Matrix effect |
|-----|----------------------|----------------------|----------|---------------------|-------------|-------------|---------------|---------------|---------------|---------------|--------------|------|---------------|
|     |                      |                      |          |                     |             |             | Intar-Day     | Inter-Day     | RSD (%) (n=6) | RSD (%) (n=6) | Mean         | RSD  |               |
|     |                      |                      |          |                     |             |             | RSD (%) (n=6) | RSD (%) (n=9) |               |               |              |      |               |
| 1   | Glutamic acid        | $Y = 20.6X + 12300$  | 0.9992   | 7.60 - 76000        | 2.16        | 7.20        | 4.19          | 2.62          | 1.52          | 1.49          | 98.87        | 3.21 | 0.98          |
| 2   | Lysine               | $Y = 220X + 22000$   | 0.9999   | 3.05 - 30500        | 0.82        | 2.73        | 1.92          | 4.20          | 1.35          | 2.09          | 96.57        | 2.42 | 1.01          |
| 3   | Histidine            | $Y = 153X + 2410$    | 0.9996   | 0.47 - 4700         | 0.14        | 0.46        | 4.64          | 1.58          | 1.33          | 1.22          | 100.58       | 4.45 | 1.02          |
| 4   | Arginine             | $Y = 170X + 90400$   | 0.9993   | 74.9 - 749000       | 1.50        | 5.00        | 3.56          | 2.42          | 2.45          | 2.19          | 96.82        | 3.65 | 0.98          |
| 5   | Threonine            | $Y = 7.34X + 4190$   | 0.9995   | 14.60 - 146000      | 1.46        | 4.87        | 2.30          | 3.43          | 2.21          | 3.33          | 95.58        | 3.51 | 0.96          |
| 6   | Aspartic acid        | $Y = 76.8X + 3960$   | 0.9991   | 3.26 - 32600        | 0.33        | 1.10        | 3.71          | 4.43          | 3.17          | 3.59          | 97.76        | 3.59 | 1.02          |
| 7   | Serine               | $Y = 31.8X + 20600$  | 0.9996   | 7.54 - 75400        | 1.51        | 5.03        | 3.66          | 2.16          | 1.75          | 1.62          | 96.94        | 2.30 | 0.99          |
| 8   | Alanine              | $Y = 5.03X + 3390$   | 0.9996   | 73.10 - 731000      | 2.92        | 9.73        | 1.45          | 2.61          | 1.84          | 3.12          | 99.67        | 3.81 | 1.04          |
| 9   | Proline              | $Y = 801X + 24800$   | 0.9998   | 58.70 - 587000      | 1.17        | 3.90        | 3.44          | 4.80          | 3.41          | 4.31          | 97.85        | 4.13 | 0.98          |
| 10  | Valine               | $Y = 2440X + 112000$ | 0.9997   | 9.58 - 95800        | 0.96        | 3.20        | 2.07          | 2.87          | 2.91          | 2.36          | 96.77        | 3.40 | 0.97          |
| 11  | Cytidine             | $Y = 802X + 470$     | 0.9998   | 1.31 - 13100        | 0.30        | 1.00        | 2.67          | 4.69          | 2.84          | 2.98          | 97.21        | 3.52 | 1.05          |
| 12  | Uracil               | $Y = 16.8X + 1070$   | 0.9997   | 6.21 - 62100        | 1.43        | 4.77        | 3.62          | 2.66          | 2.96          | 2.85          | 98.46        | 3.34 | 1.01          |
| 13  | Guanine              | $Y = 311X + 5010$    | 0.9999   | 0.20 - 1970         | 0.19        | 0.63        | 2.53          | 4.57          | 3.71          | 4.05          | 95.63        | 3.18 | 0.98          |
| 14  | Methionine           | $Y = 27.8X + 301$    | 0.9995   | 1.05 - 10500        | 0.26        | 0.87        | 4.15          | 4.65          | 4.10          | 3.95          | 97.86        | 3.46 | 1.02          |
| 15  | 2'-deoxycytidine     | $Y = 495X - 3180$    | 0.9994   | 7.03 - 70300        | 0.22        | 0.73        | 2.56          | 2.04          | 1.26          | 2.55          | 97.08        | 2.66 | 1.04          |
| 16  | Isoleucine           | $Y = 930X + 25300$   | 0.9994   | 0.78 - 7800         | 0.78        | 2.60        | 2.90          | 4.22          | 4.56          | 2.48          | 97.68        | 2.96 | 1.06          |
| 17  | Uridine              | $Y = 5.59X + 598$    | 0.9998   | 10.04 - 100400      | 1.04        | 3.47        | 3.59          | 3.09          | 1.18          | 1.64          | 98.11        | 3.25 | 0.99          |
| 18  | Leucine              | $Y = 27.7X + 8910$   | 0.9997   | 4.57 - 45700        | 1.32        | 4.40        | 3.44          | 3.32          | 3.74          | 3.53          | 96.88        | 3.98 | 0.96          |
| 19  | Tyrosine             | $Y = 580X + 18800$   | 0.9998   | 9.01 - 90100        | 0.90        | 3.00        | 2.64          | 2.53          | 2.17          | 1.88          | 98.17        | 2.44 | 0.98          |
| 20  | Adenosine            | $Y = 6300X + 129000$ | 0.9996   | 4.54 - 45400        | 0.44        | 1.47        | 2.66          | 3.89          | 3.77          | 3.42          | 101.04       | 3.32 | 0.93          |
| 21  | Inosine              | $Y = 1880X + 1400$   | 1.0000   | 1.75 - 17500        | 0.17        | 0.57        | 2.13          | 2.63          | 2.39          | 2.09          | 98.28        | 2.58 | 1.01          |
| 22  | Guanosine            | $Y = 349X + 3180$    | 0.9995   | 45.42 - 454200      | 0.45        | 1.50        | 3.74          | 2.33          | 1.49          | 1.76          | 101.92       | 2.25 | 1.03          |
| 23  | Phenylalanine        | $Y = 4320X - 47700$  | 0.9997   | 14.85 - 148500      | 0.74        | 2.47        | 2.18          | 4.22          | 2.66          | 3.99          | 100.53       | 3.01 | 0.96          |
| 24  | 2'-deoxyguanosine    | $Y = 1010X + 456$    | 0.9997   | 1.50 - 15000        | 0.15        | 0.50        | 1.98          | 4.32          | 3.85          | 4.29          | 96.69        | 2.41 | 1.08          |
| 25  | Thymidine            | $Y = 35.3X + 477$    | 0.9996   | 0.44 - 4400         | 0.13        | 0.43        | 3.35          | 3.39          | 2.44          | 2.90          | 100.22       | 2.77 | 1.05          |
| 26  | Ophiopogonin C       | $Y = 17.9X + 107$    | 0.9992   | 1.76 - 17600        | 0.45        | 1.50        | 2.25          | 4.24          | 3.98          | 3.53          | 99.38        | 1.89 | 0.95          |
| 27  | Ophiopogonin D       | $Y = 175X + 268000$  | 0.9996   | 36.80 - 368000      | 0.74        | 2.47        | 0.85          | 3.38          | 1.58          | 2.26          | 976.95       | 2.35 | 0.99          |
| 28  | Ophiopogonin D'      | $Y = 271X + 2270$    | 0.9997   | 2.06 - 20600        | 0.42        | 1.40        | 3.04          | 3.65          | 2.40          | 2.63          | 102.46       | 2.05 | 1.01          |
| 29  | Methylphiopogonone A | $Y = 578X + 2360$    | 0.9992   | 0.63 - 6300         | 0.13        | 0.43        | 1.91          | 2.51          | 1.20          | 3.96          | 98.83        | 3.66 | 0.98          |

|    |                       |                      |        |              |      |      |      |      |      |      |        |      |      |
|----|-----------------------|----------------------|--------|--------------|------|------|------|------|------|------|--------|------|------|
| 30 | Methylophiopogonone A | $Y = 2550X + 121000$ | 0.9992 | 4.93 - 49300 | 0.23 | 0.77 | 2.02 | 4.02 | 3.24 | 4.57 | 100.34 | 4.42 | 1.01 |
| 31 | Methylophiopogonone B | $Y = 4730X + 91300$  | 0.9993 | 3.15 - 31500 | 0.11 | 0.37 | 0.67 | 2.24 | 1.12 | 3.18 | 99.54  | 1.29 | 0.99 |
| 32 | Ruscogenin            | $Y = 5080X + 28100$  | 0.9998 | 0.64 - 6400  | 0.16 | 0.53 | 0.45 | 3.97 | 2.05 | 3.21 | 98.97  | 2.80 | 0.97 |

---

**Table S2.** Contents of 32 compounds in *Ophiopogonis Radix* ( $\mu\text{g/g}$ ,  $n = 3$ ).

| Anal<br>yte | CMD     |         |         |         |         |         |         |         |         |         |         |         |         |         |         |         | ZMD    |        |        |        |        |         |        |        |        |        |        |
|-------------|---------|---------|---------|---------|---------|---------|---------|---------|---------|---------|---------|---------|---------|---------|---------|---------|--------|--------|--------|--------|--------|---------|--------|--------|--------|--------|--------|
|             | S1      | S2      | S3      | S4      | S5      | S6      | S7      | S8      | S9      | S10     | S11     | S12     | S13     | S14     | S15     | S16     | S17    | S18    | S19    | S20    | S21    | S22     | S23    | S24    | S25    | S26    | S27    |
| 1           | 184.20  | 226.20  | 228.00  | 158.70  | 192.60  | 164.40  | 205.80  | 181.80  | 248.40  | 263.70  | 178.80  | 233.10  | 240.30  | 216.00  | 244.20  | 215.70  | 65.34  | 30.30  | 35.10  | 2.50   | 45.00  | 64.50   | 114.90 | 21.12  | 78.30  | 21.50  | 7.86   |
| 2           | 84.30   | 84.30   | 99.00   | 72.60   | 71.70   | 67.20   | 93.60   | 79.20   | 84.60   | 92.70   | 75.60   | 90.30   | 93.00   | 73.80   | 97.80   | 89.10   | 2.61   | 15.45  | 24.45  | 8.34   | 18.84  | 40.20   | 53.70  | 15.12  | 42.60  | 30.12  | 15.75  |
| 3           | 19.44   | 24.90   | 27.81   | 16.56   | 22.68   | 21.60   | 24.36   | 23.04   | 23.82   | 27.45   | 27.96   | 23.28   | 25.89   | 20.64   | 27.21   | 33.90   | 12.78  | 21.03  | 8.49   | 11.55  | 21.57  | 12.33   | 11.34  | 9.87   | 14.67  | 26.83  | 18.96  |
| 4           | 1749.00 | 1743.00 | 2184.00 | 1590.00 | 1245.00 | 1500.00 | 1500.00 | 1761.00 | 1902.00 | 1671.00 | 1422.00 | 1764.00 | 1746.00 | 1899.00 | 2208.00 | 1716.00 | 318.00 | 789.00 | 837.00 | 348.00 | 858.00 | 1149.00 | 870.00 | 351.00 | 744.00 | 714.18 | 462.00 |
| 5           | 876.00  | 804.00  | 924.00  | 1002.00 | 699.00  | 1014.00 | 1029.00 | 1035.00 | 780.00  | 777.00  | 732.00  | 711.00  | 753.00  | 750.00  | 753.00  | 1185.00 | 68.10  | 218.10 | 66.30  | 65.10  | 233.10 | 80.70   | 53.40  | 226.80 | 390.00 | 72.48  | 105.00 |
| 6           | 849.00  | 927.00  | 945.00  | 624.00  | 687.00  | 816.00  | 852.00  | 738.00  | 939.00  | 1038.00 | 846.00  | 960.00  | 999.00  | 876.00  | 1026.00 | 969.00  | 360.00 | 483.00 | 321.00 | 330.00 | 450.00 | 318.00  | 339.00 | 214.20 | 411.00 | 217.81 | 519.00 |
| 7           | 221.70  | 229.80  | 243.60  | 185.70  | 205.20  | 226.50  | 225.60  | 220.50  | 222.00  | 225.00  | 198.00  | 204.00  | 235.50  | 236.10  | 232.80  | 238.20  | 38.40  | 41.40  | 60.90  | 37.80  | 51.60  | 84.90   | 133.20 | 67.20  | 126.00 | 139.37 | 43.80  |
| 8           | 1158.00 | 1188.00 | 1509.00 | 879.00  | 1107.00 | 1164.00 | 1191.00 | 1080.00 | 1293.00 | 1467.00 | 1224.00 | 1284.00 | 1452.00 | 1191.00 | 1653.00 | 1452.00 | 242.10 | 381.00 | 429.00 | 193.80 | 441.00 | 435.00  | 471.00 | 339.00 | 474.00 | 263.18 | 265.50 |
| 9           | 306.00  | 390.00  | 375.00  | 196.80  | 235.50  | 293.10  | 384.00  | 262.20  | 294.30  | 420.00  | 324.00  | 357.00  | 402.00  | 321.00  | 372.00  | 393.00  | 627.00 | 627.00 | 339.00 | 594.00 | 708.00 | 381.00  | 412.50 | 466.20 | 462.90 | 648.89 | 858.00 |
| 10          | 105.30  | 118.80  | 144.30  | 74.40   | 96.30   | 115.80  | 116.40  | 95.70   | 121.80  | 156.30  | 123.00  | 130.50  | 135.30  | 114.60  | 152.70  | 138.60  | 10.71  | 21.72  | 31.20  | 10.74  | 22.02  | 31.80   | 36.00  | 17.01  | 37.20  | 71.31  | 14.58  |
| 11          | 5.70    | 10.05   | 7.53    | 3.90    | 6.39    | 5.49    | 5.70    | 4.80    | 7.65    | 10.08   | 6.84    | 10.02   | 6.99    | 7.35    | 9.60    | 8.16    | 1.60   | 1.51   | 2.71   | 1.43   | 1.88   | 2.22    | 2.09   | 0.48   | 1.40   | 1.16   | 3.39   |
| 12          | 7.71    | 9.93    | 10.74   | 5.13    | 3.39    | 5.79    | 8.61    | 7.53    | 10.38   | 10.71   | 10.35   | 13.38   | 8.79    | 9.06    | 7.32    | 4.29    | 1.99   | 3.96   | 7.71   | 4.47   | 3.12   | 4.86    | 1.89   | 0.12   | 3.03   | 2.36   | 3.27   |
| 13          | 3.36    | 6.39    | 4.68    | 1.58    | 3.57    | 2.78    | 4.08    | 2.64    | 3.66    | 7.56    | 4.86    | 5.94    | 8.16    | 4.59    | 7.26    | 6.45    | 1.20   | 1.02   | 12.93  | 30.30  | 1.42   | 13.05   | 0.62   | 0.16   | 0.75   | 4.73   | 11.55  |
| 14          | 47.70   | 44.70   | 59.40   | 27.93   | 30.00   | 37.20   | 34.20   | 36.00   | 57.90   | 69.60   | 38.10   | 59.70   | 43.20   | 64.50   | 67.80   | 45.60   | 0.04   | 3.42   | 4.20   | -      | 4.56   | 4.47    | 10.17  | 1.54   | 8.91   | 17.85  | 0.40   |
| 15          | 1.09    | 0.98    | 1.22    | 0.66    | 0.98    | 0.87    | 1.04    | 0.85    | 1.16    | 1.42    | 1.04    | 1.01    | 1.31    | 1.05    | 1.36    | 1.09    | 0.54   | 0.55   | 0.48   | 0.60   | 0.74   | 0.46    | 0.47   | 0.26   | 0.53   | 0.44   | 0.67   |
| 16          | 86.70   | 104.10  | 159.00  | 59.70   | 72.90   | 102.00  | 104.40  | 85.20   | 106.20  | 150.30  | 99.30   | 117.00  | 138.30  | 113.40  | 166.20  | 145.50  | 10.89  | 25.38  | 25.08  | 11.04  | 24.06  | 29.40   | 31.80  | 11.82  | 29.04  | 24.27  | 14.67  |
| 17          | 170.40  | 167.40  | 266.40  | 118.80  | 149.70  | 158.70  | 168.30  | 127.80  | 204.00  | 267.00  | 187.80  | 216.30  | 263.10  | 194.10  | 256.20  | 228.00  | 75.00  | 92.10  | 150.60 | 92.70  | 78.30  | 155.70  | 45.60  | 53.46  | 41.10  | 103.09 | 122.70 |
| 18          | 459.00  | 582.00  | 723.00  | 287.10  | 408.00  | 462.00  | 522.00  | 420.00  | 672.00  | 834.00  | 513.00  | 678.00  | 732.00  | 597.00  | 795.00  | 678.00  | 73.50  | 141.30 | 217.80 | 69.90  | 155.70 | 234.90  | 118.80 | 41.10  | 114.90 | 86.07  | 115.80 |
| 19          | 176.70  | 221.40  | 276.90  | 118.20  | 147.60  | 183.00  | 190.20  | 169.20  | 227.40  | 276.90  | 194.70  | 220.50  | 249.90  | 231.00  | 288.60  | 255.30  | 24.99  | 54.00  | 48.30  | 25.98  | 56.40  | 52.20   | 52.20  | 19.53  | 59.10  | 63.86  | 36.90  |
| 20          | 57.90   | 64.20   | 82.80   | 39.60   | 46.20   | 49.80   | 54.30   | 53.40   | 79.20   | 85.20   | 51.00   | 77.40   | 82.80   | 73.50   | 76.80   | 75.60   | 13.56  | 36.60  | 41.40  | 13.92  | 34.80  | 45.30   | 16.44  | 5.46   | 13.65  | 14.32  | 18.78  |
| 21          | 1.78    | 2.91    | 3.21    | 1.12    | 1.76    | 2.33    | 2.06    | 1.73    | 1.86    | 3.90    | 2.08    | 2.93    | 3.39    | 1.74    | 3.33    | 3.03    | 2.27   | 1.88   | 1.80   | 2.02   | 1.98   | 2.07    | 0.36   | 0.43   | 0.49   | 2.54   | 2.22   |
| 22          | 187.20  | 219.00  | 297.90  | 143.10  | 182.10  | 173.40  | 186.30  | 182.10  | 275.70  | 306.00  | 178.20  | 267.00  | 271.50  | 249.30  | 299.70  | 270.60  | 13.71  | 50.40  | 120.90 | 15.57  | 51.90  | 130.20  | 55.50  | 16.59  | 48.30  | 38.56  | 24.99  |
| 23          | 75.00   | 77.40   | 110.10  | 49.20   | 56.70   | 69.60   | 72.60   | 69.30   | 93.90   | 105.60  | 68.10   | 93.30   | 98.40   | 98.70   | 106.50  | 100.50  | 5.94   | 12.03  | 20.16  | 6.15   | 12.45  | 21.12   | 20.61  | 6.78   | 22.98  | 29.52  | 9.09   |
| 24          | 3.60    | 5.55    | 5.97    | 2.33    | 3.99    | 4.23    | 3.84    | 3.24    | 3.96    | 5.97    | 3.48    | 5.34    | 5.10    | 4.53    | 5.85    | 5.70    | 0.35   | 1.22   | 1.34   | 0.34   | 1.48   | 1.39    | 1.27   | 0.36   | 1.06   | 1.10   | 0.77   |
| 25          | 11.10   | 9.78    | 11.64   | 1.29    | 8.64    | 7.53    | 8.76    | 4.11    | 9.36    | 12.36   | 9.54    | 13.68   | 14.25   | 6.72    | 17.22   | 15.78   | 7.92   | 3.09   | 6.03   | 7.68   | 2.63   | 4.89    | 0.59   | 0.53   | 0.83   | 1.71   | 6.42   |
| 26          | 39.60   | 47.40   | 59.40   | 28.29   | 34.80   | 40.20   | 48.90   | 34.50   | 40.80   | 60.60   | 42.90   | 45.00   | 50.10   | 46.80   | 52.20   | 70.50   | 85.50  | 57.30  | 18.15  | 57.00  | 85.50  | 57.30   | 8.64   | 39.00  | 14.13  | 11.87  | 57.00  |
| 27          | 117.90  | 150.60  | 131.10  | 68.10   | 69.30   | 78.00   | 117.60  | 108.30  | 147.60  | 168.90  | 86.40   | 178.20  | 156.00  | 160.80  | 149.40  | 167.10  | -      | -      | -      | -      | -      | -       | -      | -      | -      | -      | -      |
| 28          | 7.14    | 6.81    | 10.29   | 4.65    | 5.88    | 4.53    | 6.60    | 5.82    | 7.08    | 12.48   | 7.14    | 8.01    | 10.23   | 9.48    | 9.39    | 10.02   | 1.36   | 1.41   | 1.97   | 0.86   | 1.36   | 1.41    | 0.83   | 0.92   | 1.56   | 6.61   | 0.86   |

|    |       |       |       |       |       |       |       |       |       |       |       |       |       |       |       |       |        |        |        |        |        |        |        |        |        |       |        |
|----|-------|-------|-------|-------|-------|-------|-------|-------|-------|-------|-------|-------|-------|-------|-------|-------|--------|--------|--------|--------|--------|--------|--------|--------|--------|-------|--------|
| 29 | 1.17  | 1.97  | 1.93  | 0.79  | 1.10  | 1.40  | 1.46  | 1.19  | 1.55  | 2.52  | 1.11  | 2.25  | 1.91  | 1.86  | 2.29  | 2.83  | 3.93   | 1.33   | 0.99   | 2.39   | 4.05   | 1.33   | 1.50   | 0.41   | 0.52   | 2.49  | 2.42   |
| 30 | 41.70 | 48.30 | 56.70 | 28.65 | 30.90 | 37.80 | 39.60 | 44.40 | 48.90 | 52.80 | 25.95 | 52.80 | 51.90 | 57.90 | 50.10 | 60.90 | 229.20 | 127.80 | 214.20 | 167.70 | 229.20 | 127.80 | 64.50  | 151.50 | 248.40 | 65.52 | 167.70 |
| 31 | 16.92 | 22.47 | 25.47 | 11.37 | 13.68 | 18.84 | 17.61 | 19.56 | 21.36 | 25.62 | 13.32 | 24.42 | 23.25 | 24.18 | 24.63 | 29.52 | 393.00 | 240.60 | 175.80 | 306.00 | 393.00 | 240.60 | 280.20 | 63.60  | 110.40 | 38.37 | 306.00 |
| 32 | 0.43  | 0.56  | 0.62  | 0.30  | 0.33  | 0.37  | 0.50  | 0.44  | 0.57  | 0.77  | 0.50  | 0.72  | 0.75  | 0.67  | 0.68  | 0.77  | 1.74   | 1.34   | 5.58   | 0.40   | 1.74   | 1.34   | -      | 0.07   | 0.06   | -     | 0.40   |

Note: "-" not detected.
